# Supplementary material
Source: Springer Nature journal article supplement (https://www.springermedizin.de/resource/supplementary/12913_2007_670_MOESM5_ESM.pdf/9535278)

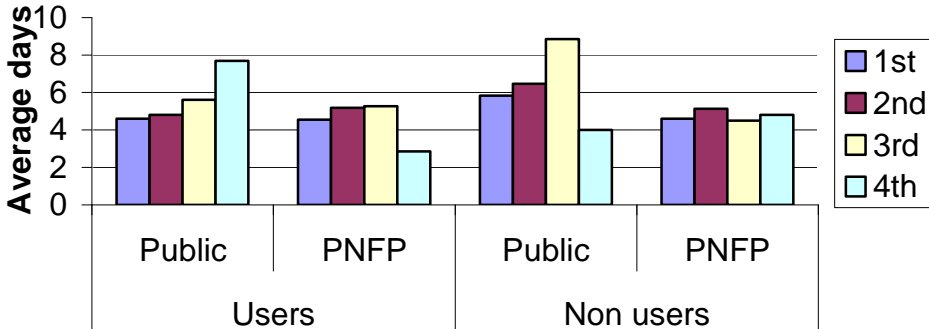

Supplement: MOESM5 [file 9535278]
